# Supplementary material
Source: PubMed Central journal article supplement (PMC1100791)

**A** mRNA Protein ID

|          |          |                                                                                            |
|----------|----------|--------------------------------------------------------------------------------------------|
| AK172810 | BAD18780 | -----MKRLLLHPAFQSCLLLLTLGL                                                                 |
| D31887   | BAA06685 | -----MKRLLLHPAFQSCLLLLTLGL                                                                 |
| AB177995 | BAD16742 | -----MKRLHPALPSCLLLVLFGL                                                                   |
| BC021530 | AAH21530 | -----MKRLHPALPSCLLLVLFGL                                                                   |
|          |          | : ****: *****: **:                                                                         |
| AK172810 | BAD18780 | WRTTPEAHASSLCAPAIASAASFLQDLIHYRCEGDSPTLQQLKALLNHLDVDGVCRCNVQHQ                             |
| D31887   | BAA06685 | WRTTPEAHASSLCAPAIASAASFLQDLIHYRCEGDSLTLQQLKALLNHLDVDGVCRCNVQHQ                             |
| AB177995 | BAD16742 | WRTAPQTHASSACLPPLSATSFLLEDLMDRYGKNDSLTLTLQKSLDLDHLHVCVCRDNVSQP                             |
| BC021530 | AAH21530 | WRTAPQTHASSACLPPLSATSFLLEDLMDRYGKNDSLTLTLQKSLDLDHLHVCVCRDNVSQP                             |
|          |          | ***: ** : ***** * * _ : ** : ***** : ** : ** : ***** : ** : ** : ***** : ** : *            |
| AK172810 | BAD18780 | VQCHRNLTSCFSSGDLFTAHNFSQSRIGSSELQEFPCPTILQQLDSQACTSENQNEENE                                |
| D31887   | BAA06685 | VQCHRNLTSCFSSGDLFTAHNFSQSRIGSSELQEFPCPTILQQLDSQACTSENQNEENE                                |
| AB177995 | BAD16742 | KECPRNLTSCFSSGDLFAAHNLSERSQICASEFQEFPCPTILQQLDSQACTSENQKSEENE                              |
| BC021530 | AAH21530 | KECPRNLTSCFSSGDLFAAHNLSERSQICASEFQEFPCPTILQQLDSQACTSENQKSEENE                              |
|          |          | : * ***** : ** : ** : ** : ** : ***** : ** : ** : ***** : ** : ** : ***** : ** : *         |
| AK172810 | BAD18780 | QTEECRPSAVEVWCGFGLSVSLINLASLLGWLVLPCTEKAFPSRVLYTFIALSICITLLSN                              |
| D31887   | BAA06685 | QTEECRPSAVEVWGYGLLCVTVISLCSLLGASVVPFMKGTTPYKRLLLYFIALAIGTLYSN                              |
| AB177995 | BAD16742 | QTEECKPSAIEVWCGYGLFCVTVISLCSLMGASVVPFMKGTTPYKRLLLYFIALAIGTLYSN                             |
| BC021530 | AAH21530 | QTEECKPSAIEVWCGFGLSVSLINLASLLGWLVLPCTEKAFPSRVLYTFIALSICITLLSN                              |
|          |          | *****: ** : ***** : ** : * : * : * : * : * : * : * : * : * : * : * : * : * : * : * : * : * |
| AK172810 | BAD18780 | ALFQLIPEAFGFPNPLEDYVYSKSAVVFGCFYLFFFTEKILKILLKQKMEHHHCHSHYASE                              |
| D31887   | BAA06685 | ALFQLIPEAFGFPNPLEDYVYSKSAVVFGCFYLFFFTEKILKILLKQKMEHHHCHSHYASE                              |
| AB177995 | BAD16742 | ALFQLIPEAFGFPN-QDNYVYSKSAVVFGCFYLFFFTEKILKILLKQKMEHHHCHSHYASE                              |
| BC021530 | AAH21530 | ALFQLIPEAFGFPN-QDNYVYSKSAVVFGCFYLFFFTEKILKILLKQKMEHHHCHSHYASE                              |
|          |          | ***** : * ***** : ***** : ***** : * : **                                                   |
| AK172810 | BAD18780 | SLPSKRDQEEGVMEKLNQGLDHHMIPQHCSELDCKAPHVDEKVIVCSLSVQDLQASQSA                                |
| D31887   | BAA06685 | SLPSKRDQEEGVMEKLNQGLDHHMIPQHCSELDCKAPHVDEKVIVCSLSVQDLQASQSA                                |
| AB177995 | BAD16742 | TLPSKRDQEEGVTEKLNQGLDHHMIPQHCNSELDCKAPGTDKRVIVNSMSVQDLQASQSA                               |
| BC021530 | AAH21530 | TLPSKRDQEEGVTEKLNQGLDHHMIPQHCNSELDCKAPGTDKRVIVNSMSVQDLQASQSA                               |
|          |          | : ***** : ***** : ***** : ***** : * : *****                                                |
| AK172810 | BAD18780 | CYWLKGVRYSDICTLAWMITLSDGLHNFIDGLAIGASFTVSVFQIGISTVAIIICEEFPPE                              |
| D31887   | BAA06685 | CYWLKGVRYSDICTLAWMITLSDGLHNFIDGLAIGASFTVSVFQIGISTVAIIICEEFPPE                              |
| AB177995 | BAD16742 | CYWLKGVRYSDICTLAWMITLSDGLHNFIDGLAIGASFTVSVFQIGISTVAIIICEEFPPE                              |
| BC021530 | AAH21530 | CYWLKGVRYSDICTLAWMITLSDGLHNFIDGLAIGASFTVSVFQIGISTVAIIICEEFPPE                              |
|          |          | ***** : ***** : ***** : ***** : * : *****                                                  |
| AK172810 | BAD18780 | LGDFVILLNAGMSIQQALFFNFLSACCCYLGLAFGILACSHFSANWIFALACGMFLYISL                               |
| D31887   | BAA06685 | LGDFVILLNAGMSIQQALFFNFLSACCCYLGLAFGILACSHFSANWIFALACGMFLYISL                               |
| AB177995 | BAD16742 | LGDFVILLNAGMSIQQALFFNFLSACCCYLGLAFGILACSHFSANWIFALACGMFLYIAL                               |
| BC021530 | AAH21530 | LGDFVILLNAGMSIQQALFFNFLSACCCYLGLAFGILACSHFSANWIFALACGMFLYIAL                               |
|          |          | ***** : ***** : ***** : ***** : * : *****                                                  |
| AK172810 | BAD18780 | ADMFPEMNEVCQEDERRGSLIPFIIQNLGLLTGFTIMVVLMTYSGQIQIG                                         |
| D31887   | BAA06685 | ADMFPEMNEVCQEDERRGSLIPFIIQNLGLLTGFTIMVVLMTYSGQIQIG                                         |
| AB177995 | BAD16742 | ADMFPEMNEVCQEDERKNSFLVPPFVIQNLGLLTGFSIMLVLMTYSGQIQIG                                       |
| BC021530 | AAH21530 | ADMFPEMNEVCQEDERKNSFLVPPFVIQNLGLLTGFSIMLVLMTYSGQIQIG                                       |
|          |          | ***** : * : * : * : * : ***** : ** : *****                                                 |

**B**

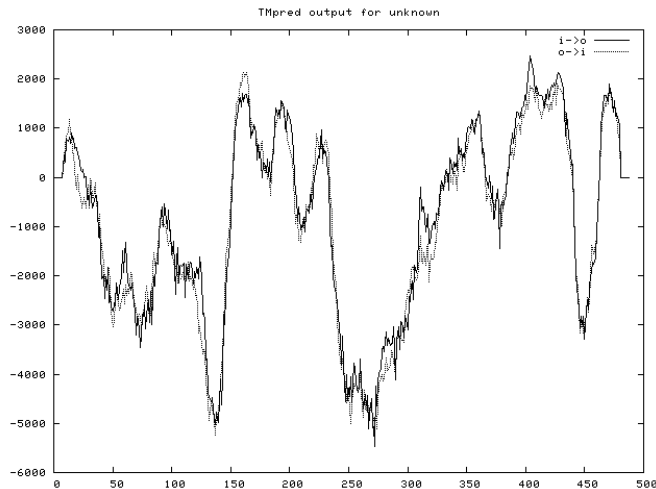

Supplement: pnas_102_19_6843__1.pdf [file pnas_102_19_6843__1.pdf]
